# Supplementary material
Source: publisher figshare collection journal article supplement (https://springernature.figshare.com/ndownloader/files/15340346)

# A

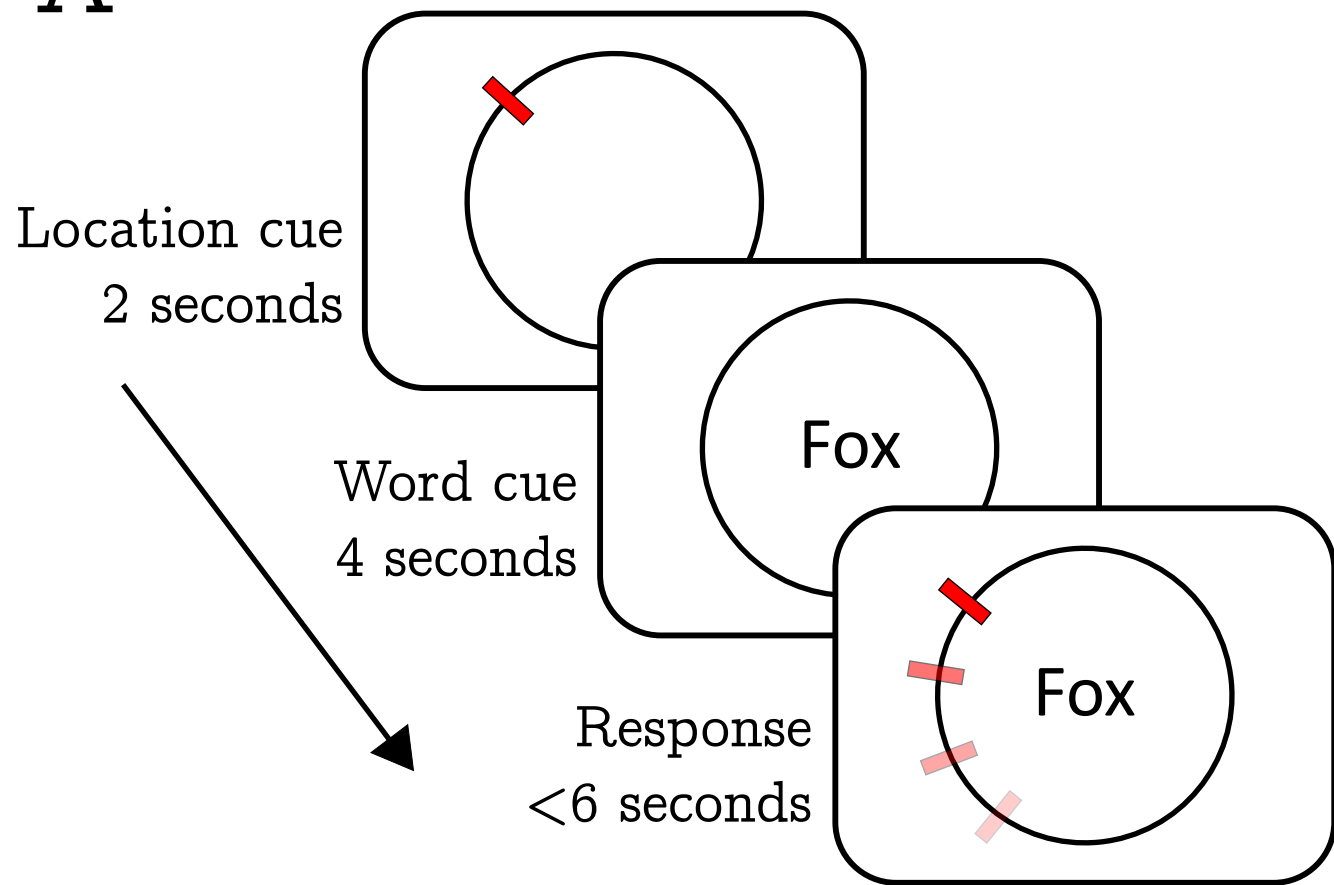

# B

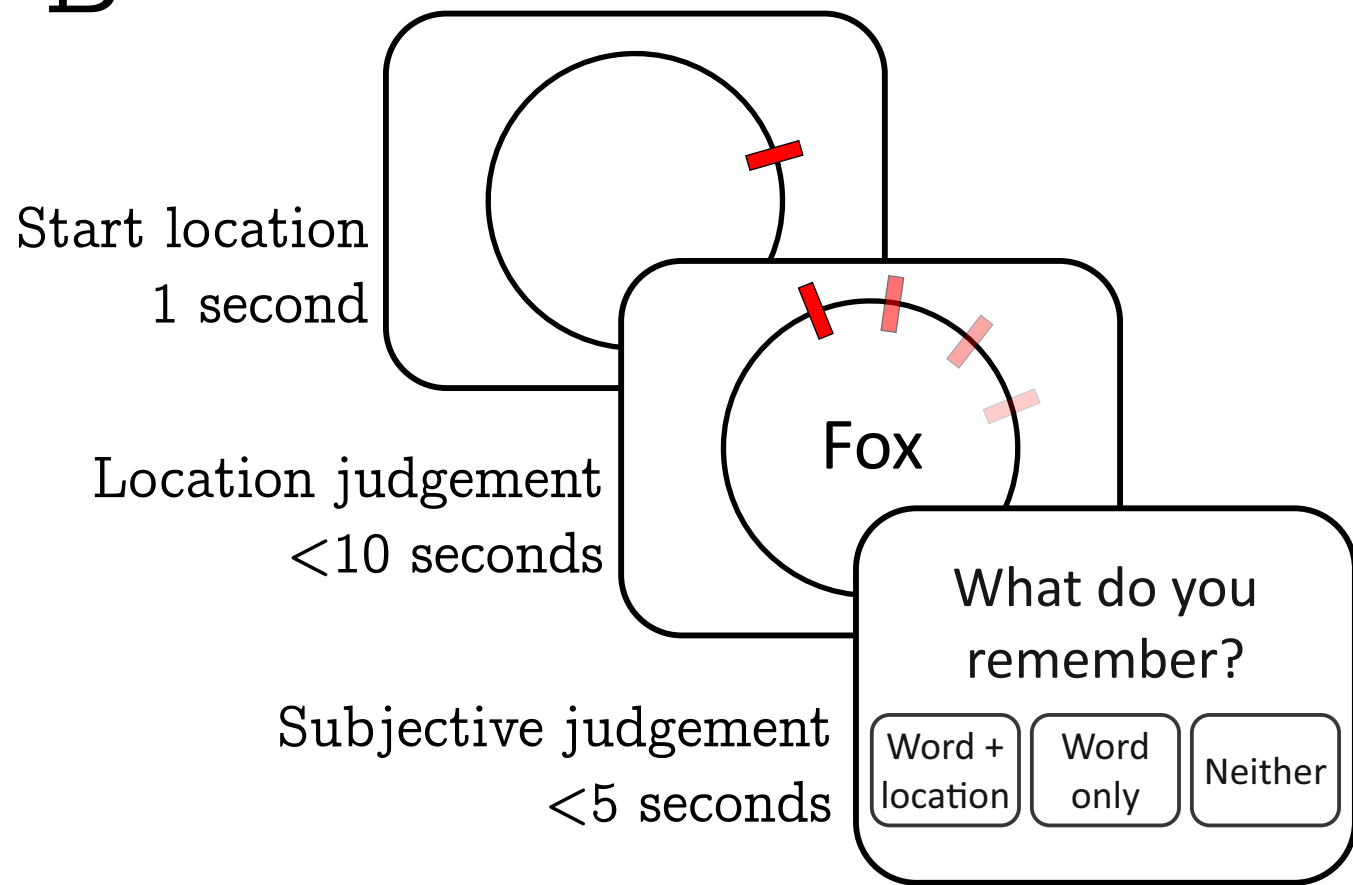

Supplement: Supplementary file 1 [file 15340346]
